# Supplementary material for: Screening for Intimate Partner Violence Experience and Use in the Veterans Health Administration
Source: PubMed Central journal article supplement (PMC10576210; doi:10.1001/jamanetworkopen.2023.37685), 2023-10-13
Supplement: jamanetwopen-e2337685-s002.pdf [file jamanetwopen-e2337685-s002.pdf]

## Data Sharing Statement

Portnoy. Screening for Intimate Partner Violence Experience and Use in the Veterans Health Administration. *JAMA Netw Open*. Published October 13, 2023.

doi:10.1001/jamanetworkopen.2023.37685

### Data

**Data available:** Yes

**Data types:** Deidentified participant data, Data dictionary

**How to access data:** Those interested in the deidentified dataset and data dictionary underlying this manuscript can send an email request to the corresponding author:

[galina.portnoy@va.gov](mailto:galina.portnoy@va.gov)

**When available:** With publication

### Supporting Documents

**Document types:** Other (please specify)

**Additional Information:** Supplemental material has been provided by the authors for additional information about the International Classification of Disease (ICD-9 and 10) diagnosis codes used to identify potential comorbidities.

**How to access documents:** [galina.portnoy@va.gov](mailto:galina.portnoy@va.gov)

**When available:** With publication

### Additional Information

**Who can access the data:** Anyone

**Types of analyses:** For a specified purpose

**Mechanisms of data availability:** With a signed data access agreement

**Any additional restrictions:** Data sharing will be required to comply with government procedures
